# Supplementary material
Source: PubMed Central journal article supplement (PMC3428148)
Supplement: NIHMS370469-supplement-supp_data.pdf [file NIHMS370469-supplement-supp_data.pdf]

## Supplementary Figure legends

**Supplementary Figure S1:** The caspase-1 inhibitor Ac-YVAD-cmk prevents HMGB1 release from LPS+ATP- and LPS+nigericin-stimulated BMDMs, and from *Salmonella*-infected macrophages. BMDMs were left untreated (CTRL) or primed with 10 µg/ml LPS for 3 h before DMSO or the caspase-1 inhibitor Ac-YVAD-cmk (50 µM, Bachem) was added for 30 minutes and cells were stimulated with 5 mM ATP (LPS+ATP) or 20 µM nigericin (LPS+nigericin) for 30 min. Alternatively, macrophages were pretreated with DMSO or Ac-YVAD-cmk (50 µM, Bachem) for 30 minutes before being infected with wild type *Salmonella* (MOI 10) for 1h. Culture supernatants were analyzed for HMGB1 release by Western blotting. Data are representative of 3 independent experiments.

**Supplementary Figure S2:** HMGB1 release from LPS+ATP- and LPS+nigericin-stimulated BMDMs and from *Salmonella*-infected macrophages pretreated with the cathepsin B inhibitor CA-074-OMe. BMDMs were left untreated (CTRL) or primed with 10 µg/ml LPS for 3 h before DMSO or the cathepsin B inhibitor CA-074-OMe (50 µM, Enzo Life Sciences) was added for 30 minutes and cells were stimulated with 5 mM ATP (LPS+ATP) or 20 µM nigericin (LPS+nigericin) for 30 min. Alternatively, macrophages were pretreated with DMSO or CA-074-OMe (50 µM, Enzo Life Sciences) for 30 minutes before being infected with wild type *Salmonella* (MOI 10) for 1h. Culture supernatants were analyzed for HMGB1 release by Western blotting. Data are representative of 3 independent experiments.

**Supplementary Figure S3:** Caspase-1 activation and IL-1 $\beta$  secretion from *Salmonella*-infected macrophages requires bacterial flagellin and a functional type III secretion. (A, B) BMDMs were left untreated (CTRL), infected with wild type *Salmonella* (MOI 10), or with the type III secretion system-deficient (*SipB*<sup>-</sup>) or flagellin-deficient (*fljB*<sup>-</sup>/*fliC*<sup>-</sup>) mutants for 1h. Cell lysates were analyzed for caspase-1 activation by Western blotting. Black arrowhead indicate procaspase-1, and white arrowheads mark the processed p20 subunit. Culture supernatants were also collected and analyzed for secreted IL-1 $\beta$  by ELISA. Data represent the mean  $\pm$  S.D. of triplicate samples from a single experiment, and all results are representative of 3 independent experiments.

**Supplementary Figure S4:** TNF- $\alpha$  secretion is independent of the Ipaf inflammasome. BMDMs from wild type and *Ipaf*<sup>-</sup> mice were left untreated (CTRL) or infected with wild type *Salmonella* (MOI 10) for 1 h. Culture supernatants were collected and analyzed for secreted TNF- $\alpha$  by ELISA. Data represent the mean  $\pm$  S.D. of triplicate samples from a single experiment, and are representative of 3 independent experiments.

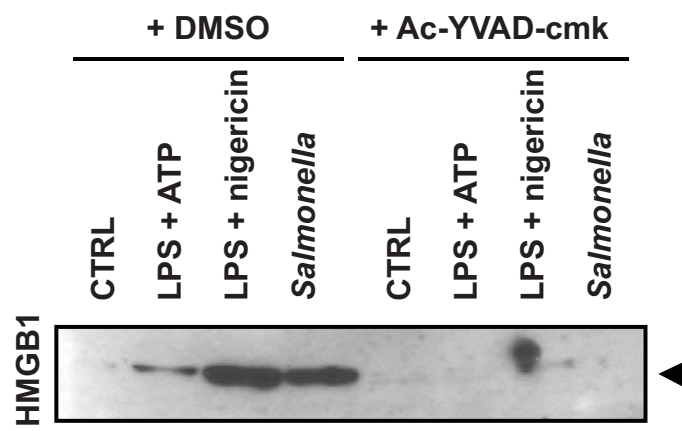

Supplementary Fig. S1

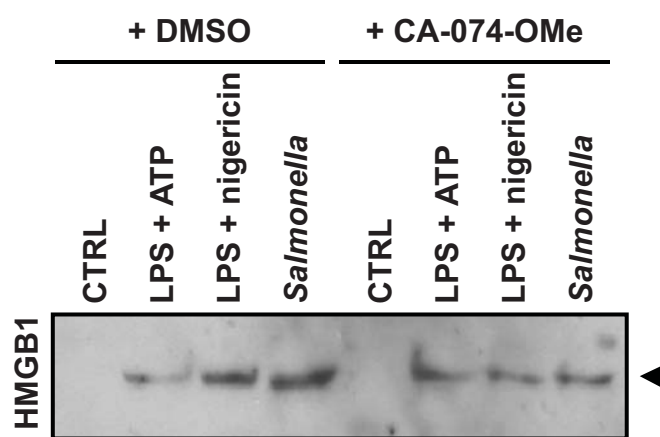

Supplementary Fig. S2

**A**

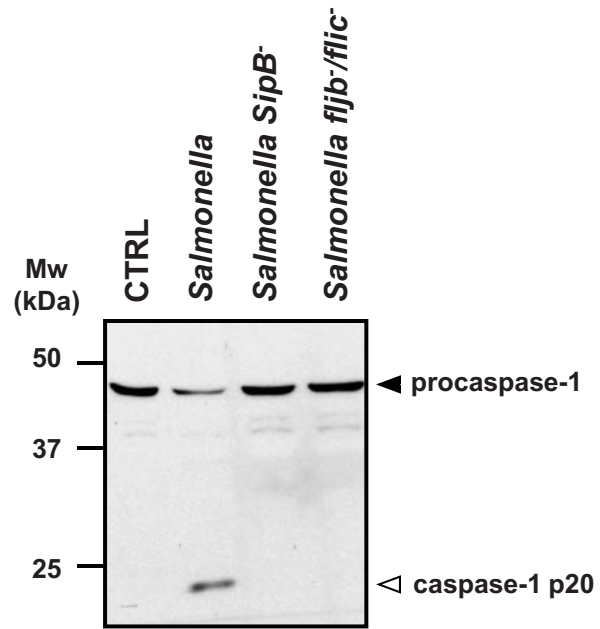

**B**

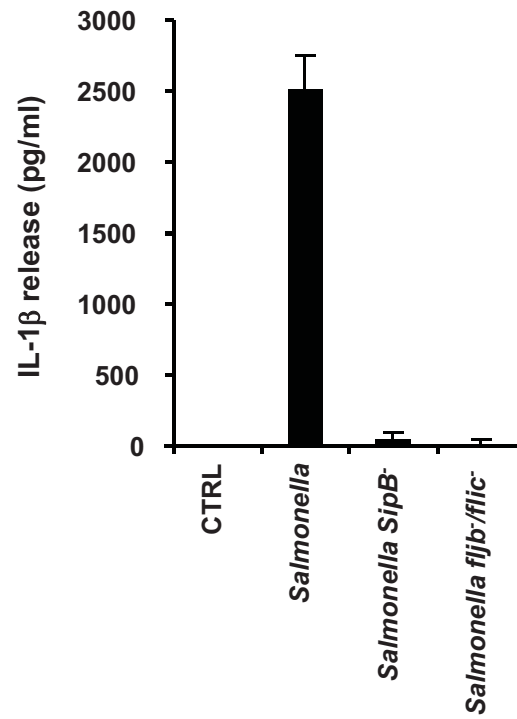

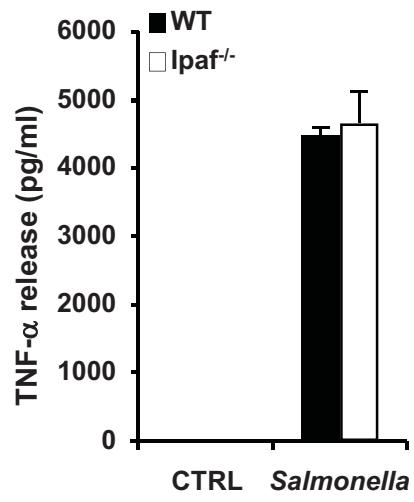

Supplementary Fig. S4
